# Supplementary material
Source: publisher figshare collection journal article supplement (https://frontiersin.figshare.com/ndownloader/files/13060034)
Supplement: Supplementary file [file 13060034]

## Supplemental material

Table S1. *P* values with concentration of each biliary BA between groups.

|              | Total BAs     | CA            | TUDCA         | CDCA          | TCDCa         | DCA           | TCA           | TDCA          | UDCA          | LCA           | TLCA   |
|--------------|---------------|---------------|---------------|---------------|---------------|---------------|---------------|---------------|---------------|---------------|--------|
| TCAvsTCDCA   | <b>0.0003</b> | <b>0.0002</b> | 0.1394        | 0.1275        | <b>0.0084</b> | <b>0.0006</b> | 0.1718        | <b>0.0122</b> | <b>0.0131</b> | 0.1505        | 0.9217 |
| TCAvsTUDCA   | <b>0.0002</b> | <b>0.0002</b> | 0.2807        | 0.1875        | <b>0.0084</b> | <b>0.0006</b> | 0.7499        | <b>0.0345</b> | 0.6825        | 0.4882        | 0.1747 |
| TCAvsTLCA    | <b>0.0001</b> | <b>0.0002</b> | <b>0.0119</b> | <b>0.0233</b> | <b>0.0086</b> | <b>0.0006</b> | 0.2949        | <b>0.0128</b> | <b>0.0043</b> | 0.5096        | 0.7612 |
| TCAvsTDCA    | <b>0.0001</b> | <b>0.0002</b> | 0.3706        | 0.3900        | <b>0.0085</b> | <b>0.0006</b> | <b>0.0293</b> | <b>0.0201</b> | 0.8350        | 0.0541        | 0.1747 |
| TCAvsCtrl    | <b>0.0001</b> | <b>0.0002</b> | <b>0.0110</b> | <b>0.0196</b> | <b>0.0084</b> | <b>0.0006</b> | <b>0.0242</b> | <b>0.0150</b> | <b>0.0056</b> | 0.9477        | 0.1747 |
| TCAvsChol    | <b>0.0001</b> | <b>0.0003</b> | <b>0.0069</b> | <b>0.0184</b> | <b>0.0084</b> | <b>0.0006</b> | 0.2540        | 0.1300        | <b>0.0171</b> | 0.0541        | 0.1747 |
| TCDCAvsTUDCA | 0.5032        | 0.2862        | 0.5993        | 0.6890        | 1.0000        | 0.3821        | 0.1302        | 0.1199        | 0.0602        | 0.4377        | 0.0907 |
| TCDCAvsTLCA  | <b>0.0087</b> | <b>0.0208</b> | <b>0.0101</b> | <b>0.0072</b> | 0.0828        | 0.8585        | 0.7005        | 0.1271        | 0.1684        | 0.3536        | 0.8053 |
| TCDCAvsTDCA  | 0.0567        | 0.0887        | <b>0.0571</b> | 0.3975        | 0.3506        | 0.5160        | 0.1878        | 0.4009        | <b>0.0346</b> | <b>0.0460</b> | 0.0907 |
| TCDCAvsCtrl  | <b>0.0075</b> | <b>0.0119</b> | <b>0.0101</b> | <b>0.0041</b> | 1.0000        | 0.2823        | 0.1301        | 0.6618        | 0.1410        | 0.1522        | 0.0907 |
| TCDCAvsChol  | <b>0.0311</b> | 0.3370        | <b>0.0064</b> | 0.0945        | 1.0000        | 0.1513        | 0.6527        | 0.5053        | 0.8104        | <b>0.0460</b> | 0.0907 |
| TUDCAvsTLCA  | <b>0.0041</b> | <b>0.0217</b> | <b>0.0107</b> | <b>0.0134</b> | 0.0828        | 0.2927        | 0.2990        | 0.4851        | <b>0.0177</b> | 0.9465        | 0.1705 |
| TUDCAvsTDCA  | 0.0908        | 0.2446        | 0.1067        | 0.5956        | 0.3506        | 0.8380        | <b>0.0021</b> | 0.2305        | 0.8481        | 0.1223        | 1.0000 |
| TUDCAvsCtrl  | <b>0.0030</b> | <b>0.0051</b> | <b>0.0104</b> | <b>0.0086</b> | 1.0000        | 0.0857        | <b>0.0009</b> | 0.1583        | <b>0.0186</b> | 0.4699        | 1.0000 |
| TUDCAvsChol  | <b>0.0338</b> | <b>0.0119</b> | <b>0.0064</b> | 0.0948        | 1.0000        | <b>0.0482</b> | 0.1994        | 0.3697        | 0.0786        | 0.1223        | 1.0000 |
| TLCAvsTDCA   | 0.1155        | 0.1021        | 0.1714        | <b>0.0299</b> | 0.1038        | 0.4117        | 0.1039        | 0.4103        | <b>0.0104</b> | 0.0841        | 0.1705 |
| TLCAvsCtrl   | 0.8202        | 0.1363        | 0.9990        | 0.6606        | 0.0828        | 0.3260        | 0.0722        | 0.2168        | 0.8917        | 0.4898        | 0.1705 |
| TLCAvsChol   | 0.1632        | <b>0.0002</b> | 0.5606        | <b>0.0375</b> | 0.0828        | 0.1599        | 0.9988        | 0.7030        | 0.1313        | 0.0841        | 0.1705 |
| TDCAvsCtrl   | 0.0792        | <b>0.0333</b> | 0.1621        | <b>0.0226</b> | 0.3506        | 0.1315        | 0.8135        | 0.6475        | <b>0.0113</b> | 0.0517        | 1.0000 |
| TDCAvsChol   | 0.6694        | <b>0.0014</b> | 0.1001        | 0.1005        | 0.3506        | 0.0794        | <b>0.0406</b> | 0.8423        | <b>0.0456</b> | 1.0000        | 1.0000 |
| CtrlvsChol   | 0.0998        | <b>0.0001</b> | 0.5409        | <b>0.0184</b> | 1.0000        | 0.8499        | <b>0.0206</b> | 0.6409        | 0.1126        | 0.0517        | 1.0000 |

The name of each row means between which two groups the comparison happened, the name of each column means each biliary BA. *P* values lesser than 0.05 are bolded.

Table S2. *P* values with F/B ratio and four parameters of alpha diversity between groups.

|              | F/B           | Shannon       | Simpson       | Chao 1 index  | PD_whole_tree |
|--------------|---------------|---------------|---------------|---------------|---------------|
| TCAvsTCDCA   | <b>0.0305</b> | 0.2052        | 0.2927        | 0.2938        | 0.3306        |
| TCAvsTUDCA   | 0.1167        | <b>0.0021</b> | <b>0.0011</b> | 0.1188        | <b>0.0477</b> |
| TCAvsTLCA    | <b>0.0361</b> | 0.3245        | 0.4247        | 0.1803        | 0.1444        |
| TCAvsTDCA    | 0.2223        | <b>0.0343</b> | <b>0.0118</b> | 0.1407        | 0.1284        |
| TCAvsCtrl    | <b>0.0209</b> | <b>0.0010</b> | <b>0.0003</b> | 0.1647        | 0.2973        |
| TCAvsChol    | 0.4911        | <b>0.0004</b> | <b>0.0001</b> | 0.0501        | <b>0.0096</b> |
| TCDCAvsTUDCA | 0.1127        | <b>0.0016</b> | <b>0.0004</b> | <b>0.0278</b> | <b>0.0202</b> |
| TCDCAvsTLCA  | <b>0.0143</b> | 0.3796        | 0.2576        | 0.3152        | 0.2240        |
| TCDCAvsTDCA  | <b>0.0286</b> | <b>0.0123</b> | <b>0.0040</b> | <b>0.0383</b> | 0.0600        |
| TCDCAvsCtrl  | 0.3627        | <b>0.0019</b> | <b>0.0002</b> | <b>0.0419</b> | 0.1542        |
| TCDCAvsChol  | 0.0652        | <b>0.0006</b> | <b>0.0000</b> | <b>0.0082</b> | <b>0.0045</b> |
| TUDCAvsTLCA  | 0.3754        | <b>0.0052</b> | <b>0.0047</b> | <b>0.0134</b> | <b>0.0073</b> |
| TUDCAvsTDCA  | 0.1480        | 0.2864        | 0.3207        | 0.4845        | 0.3645        |
| TUDCAvsCtrl  | 0.1115        | 0.4220        | 0.4149        | 0.3427        | 0.0681        |
| TUDCAvsChol  | 0.1159        | 0.3429        | 0.3701        | 0.3021        | 0.1750        |
| TLCAvsTDCA   | <b>0.0243</b> | <b>0.0284</b> | <b>0.0246</b> | <b>0.0197</b> | <b>0.0219</b> |
| TLCAvsCtrl   | <b>0.0140</b> | <b>0.0065</b> | <b>0.0044</b> | <b>0.0207</b> | 0.0512        |
| TLCAvsChol   | <b>0.0138</b> | <b>0.0024</b> | <b>0.0016</b> | <b>0.0042</b> | <b>0.0022</b> |
| TDCAvsCtrl   | <b>0.0242</b> | 0.3250        | 0.3684        | 0.3680        | 0.1898        |
| TDCAvsChol   | 0.2059        | 0.1872        | 0.2193        | 0.2988        | 0.1409        |
| CtrlvsChol   | 0.0518        | 0.2382        | 0.2545        | 0.1512        | <b>0.0083</b> |

The name of each row indicates which two groups were compared. *P* values lesser than 0.05 are bolded.

Table S3: PERMANOVA analysis of gut microbiota with weighted\_unifrac distance

|       | TCA           | TCDCA         | TLCA          | TDCA          | TUDCA         | Ctrl          | Chol          |
|-------|---------------|---------------|---------------|---------------|---------------|---------------|---------------|
| TCA   |               | <b>0.0044</b> | <b>0.0035</b> | <b>0.0005</b> | <b>0.0002</b> | <b>0.0037</b> | <b>0.0004</b> |
| TCDCA | <i>7.11</i>   |               | <i>0.2803</i> | <b>0.0118</b> | <b>0.0058</b> | <b>0.0314</b> | <b>0.0009</b> |
| TLCA  | <i>12.27</i>  | <i>1.20</i>   |               | <i>0.088</i>  | <b>0.0566</b> | <i>0.1559</i> | <b>0.006</b>  |
| TDCA  | <i>39.16</i>  | <b>8.46</b>   | <i>2.90</i>   |               | <i>0.7645</i> | <i>0.7381</i> | <i>0.7532</i> |
| TUDCA | <i>43.97</i>  | <b>9.79</b>   | <b>3.52</b>   | <i>0.08</i>   |               | <i>0.5933</i> | <i>0.8044</i> |
| Ctrl  | <i>24.34</i>  | <b>5.90</b>   | <i>1.94</i>   | <i>0.20</i>   | <i>0.26</i>   |               | <i>0.7305</i> |
| Chol  | <i>131.00</i> | <b>16.50</b>  | <b>6.48</b>   | <i>0.68</i>   | <i>0.59</i>   | <i>0.73</i>   |               |

Pseudo-F values of the PERMANOVA tests are italicized, *P* values lesser than 0.05 are bolded, and *P* values are regular font

Table S4. The gut microbiota taxa at the genus level most strongly correlated with the location of 1<sup>st</sup> and 2<sup>ed</sup> axis of the principal coordinates (PCoA) analysis (r values)

|                      | PCoA1        | PCoA2        |
|----------------------|--------------|--------------|
| <i>Cetobacterium</i> | <b>-0.97</b> | 0.18         |
| <i>Bacteroides</i>   | <b>0.75</b>  | <b>0.63</b>  |
| Lachnospiraceae      | <b>0.75</b>  | <b>0.32</b>  |
| <i>Citrobacter</i>   | <b>0.51</b>  | -0.04        |
| <i>Delftia</i>       | 0.41         | <b>-0.73</b> |
| Enterobacteriaceae   | 0.45         | <b>-0.70</b> |
| <i>Rhizobiales</i>   | 0.27         | <b>-0.55</b> |

Pvalues lesser than 0.05 are bolded

Table S5. Pvalues of test for 32 bacterial taxa at genus level overall groups and between each experimental group and Ctrl group.

|                     | All<br>groups | TCA<br>vs Ctrl | TCDCA<br>vs Ctrl | TUDCA<br>vs Ctrl | TLCA<br>vs Ctrl | TDCA<br>vs Ctrl | Chol<br>vs Ctrl |
|---------------------|---------------|----------------|------------------|------------------|-----------------|-----------------|-----------------|
| Meiothermus         | <b>0.0142</b> | <b>0.0448</b>  | 0.0903           | 1.0000           | <b>0.0426</b>   | 0.1200          | 0.1812          |
| Clavibacter         | <b>0.0014</b> | 0.0674         | 0.1219           | 0.1812           | 0.1527          | <b>0.0378</b>   | <b>0.0306</b>   |
| Bacteroides         | <b>0.0032</b> | <b>0.0428</b>  | 0.2737           | 0.1675           | 0.1792          | 0.1089          | 0.1791          |
| Bacteroidaceae      | <b>0.0105</b> | 0.0667         | 0.0923           | 0.0801           | 0.1262          | 0.1668          | 0.2813          |
| Pasteurellaceae     | <b>0.0356</b> | <b>0.0309</b>  | 0.1352           | 0.0665           | 0.1609          | 0.4668          | 0.3414          |
| Flavobacterium      | <b>0.0253</b> | 0.0698         | 0.1802           | 0.1607           | 0.0729          | 0.2787          | <b>0.0433</b>   |
| Brevibacillus       | <b>0.0055</b> | 1.0000         | 1.0000           | <b>0.0223</b>    | <b>0.0421</b>   | 0.1036          | 0.1294          |
| Staphylococcus      | <b>0.0426</b> | 0.1150         | 0.0874           | 0.1812           | 0.1487          | 0.1671          | 0.1812          |
| Lactococcus         | <b>0.0192</b> | 0.1262         | <b>0.0250</b>    | 0.0915           | 0.0593          | 0.0684          | 0.2945          |
| Clostridiaceae      | <b>0.0396</b> | 0.1175         | 0.1382           | 0.0862           | <b>0.0408</b>   | 0.1225          | 0.3694          |
| Lachnospiraceae     | <b>0.0012</b> | <b>0.0014</b>  | 0.4130           | 0.1627           | 0.1138          | 0.0956          | 0.2431          |
| Coprococcus         | <b>0.0164</b> | <b>0.0002</b>  | <b>0.0366</b>    | 0.3388           | 0.1164          | 0.1018          | 0.1367          |
| Ruminococcaceae     | <b>0.0094</b> | <b>0.0017</b>  | 0.1289           | <b>0.0186</b>    | 0.1424          | 0.1619          | <b>0.0400</b>   |
| Erysipelotrichaceae | <b>0.0426</b> | <b>0.0328</b>  | 0.1108           | 0.0682           | 0.1454          | 0.4434          | 0.4756          |
| Cetobacterium       | <b>0.0000</b> | <b>0.0000</b>  | <b>0.0215</b>    | <b>0.0000</b>    | 0.0746          | 0.3994          | 0.1155          |
| Fusobacteriaceae    | <b>0.0008</b> | <b>0.0071</b>  | <b>0.0033</b>    | <b>0.0000</b>    | <b>0.0077</b>   | <b>0.0096</b>   | <b>0.0195</b>   |
| Leptotrichia        | <b>0.0484</b> | <b>0.0222</b>  | 0.0932           | <b>0.0014</b>    | 0.4504          | 0.2036          | 0.3367          |
| Rhizobiales         | <b>0.0050</b> | 0.4033         | 0.1391           | <b>0.0234</b>    | <b>0.0388</b>   | 0.1185          | 0.0588          |
| Rhodobacter         | <b>0.0056</b> | 0.2946         | 0.0962           | 0.0818           | 0.0630          | 0.2021          | 0.1688          |
| Rhodospirillaceae   | <b>0.0010</b> | 0.1643         | 0.1003           | 0.2246           | 0.0792          | 0.2775          | <b>0.0155</b>   |
| Burkholderiales     | <b>0.0051</b> | 0.3557         | 0.0558           | <b>0.0257</b>    | 0.2118          | 0.1365          | 0.3608          |
| Comamonadaceae      | <b>0.0103</b> | 0.1398         | 0.1400           | 0.1369           | <b>0.0272</b>   | 0.2962          | 0.3399          |
| Delftia             | <b>0.0194</b> | 0.1751         | 0.0570           | 0.1037           | <b>0.0199</b>   | 0.2546          | 0.0516          |
| Neisseriaceae_other | <b>0.0095</b> | 0.1520         | 0.2271           | 0.0680           | 0.1373          | 0.1407          | 0.1828          |
| Kingella            | <b>0.0033</b> | 0.1332         | 0.0959           | 0.1433           | 0.2731          | 0.1468          | 0.1683          |

|                        |               |               |               |               |               |        |               |
|------------------------|---------------|---------------|---------------|---------------|---------------|--------|---------------|
| Aeromonadaceae         | <b>0.0112</b> | 0.0942        | 0.3983        | 0.2561        | 0.1887        | 0.3344 | <b>0.0493</b> |
| Enterobacteriaceae     | <b>0.0012</b> | <b>0.0329</b> | <b>0.0369</b> | <b>0.0009</b> | <b>0.0128</b> | 0.1817 | 0.2661        |
| Citrobacter            | <b>0.0001</b> | <b>0.0018</b> | 0.0826        | 0.0581        | 0.0618        | 0.0791 | <b>0.0429</b> |
| Aggregatibacter        | <b>0.0222</b> | <b>0.0114</b> | 0.2038        | <b>0.0000</b> | 0.1796        | 0.3634 | 0.3560        |
| Acinetobacter          | <b>0.0002</b> | <b>0.0153</b> | 0.0518        | 0.0685        | 0.0866        | 0.4985 | <b>0.0003</b> |
| Pseudoalteromonadaceae | <b>0.0021</b> | <b>0.0383</b> | 0.0747        | <b>0.0005</b> | 0.0854        | 0.1646 | 0.1027        |
| Luteolibacter          | <b>0.0034</b> | 0.1205        | 0.1084        | 0.1830        | 0.1357        | 0.0786 | 0.0682        |

---

*P* values lesser than 0.05 are bolded

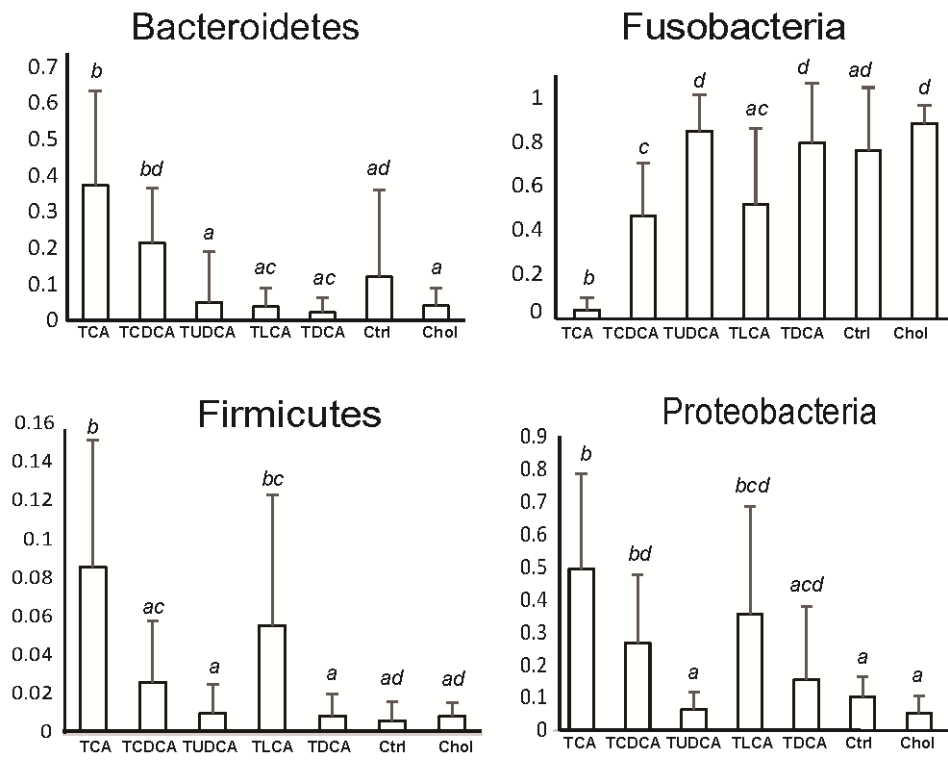

**Fig. S1:** Prevalence of four most abundant microbial phyla in experimental groups (x-axis). Different letters above bars indicate statistically significant ( $p < 0.05$ ) differences between groups. Groups not sharing the same lowercase letter are significantly different ( $P < 0.05$ ).

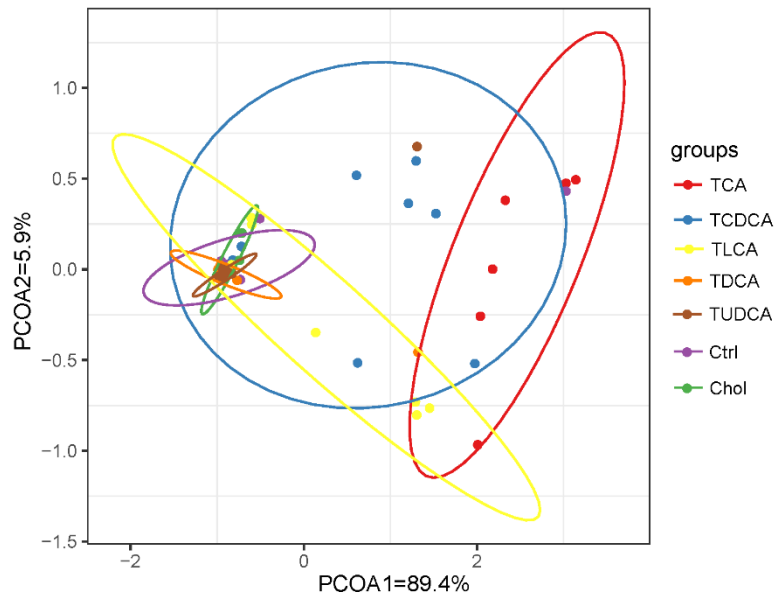

**Fig. S2:** Principal coordinate analysis (PCoA) performed on weighted\_unifrac distance of bacterial OTUs. For the TCA fed group, n=6; for the TCDCA fed, TLCA fed, TDCA fed and Ctrl groups, n=8; for the TUDCA fed and Chol groups, n=9.
